# Supplementary material for: Ultrastable conductive microporous covalent triazine frameworks based on pyrene moieties provide high-performance CO2 uptake and supercapacitance
Source: Royal Society of Chemistry journal article supplement (doi:10.1039/d0nj01292k), 2020-01-01
Supplement: d0nj01292k1.pdf [file d0nj01292k1.pdf]

# **Ultrastable Conductive Microporous Covalent Triazine Frameworks Based on Pyrene Moieties Provide High-Performance CO<sub>2</sub> Uptake and Supercapacitance**

**Mohamed Gamal Mohamed,<sup>a,b</sup> Ahmed F. M. EL-Mahdy,<sup>a,b</sup> Yasuno Takashi,<sup>a</sup> and Shiao-Wei Kuo<sup>a,c,\*</sup>**

<sup>a</sup>Department of Materials and Optoelectronic Science, Center of Crystal Research, National Sun Yat-Sen University, Kaohsiung 80424, Taiwan

<sup>b</sup>Chemistry Department, Faculty of Science, Assiut University, Assiut 71516, Egypt

<sup>c</sup>Department of Medicinal and Applied Chemistry, Kaohsiung Medical University, Kaohsiung, 807, Taiwan

\*To whom correspondence should be addressed

Email: [kuosw@faculty.nsysu.edu.tw](mailto:kuosw@faculty.nsysu.edu.tw)

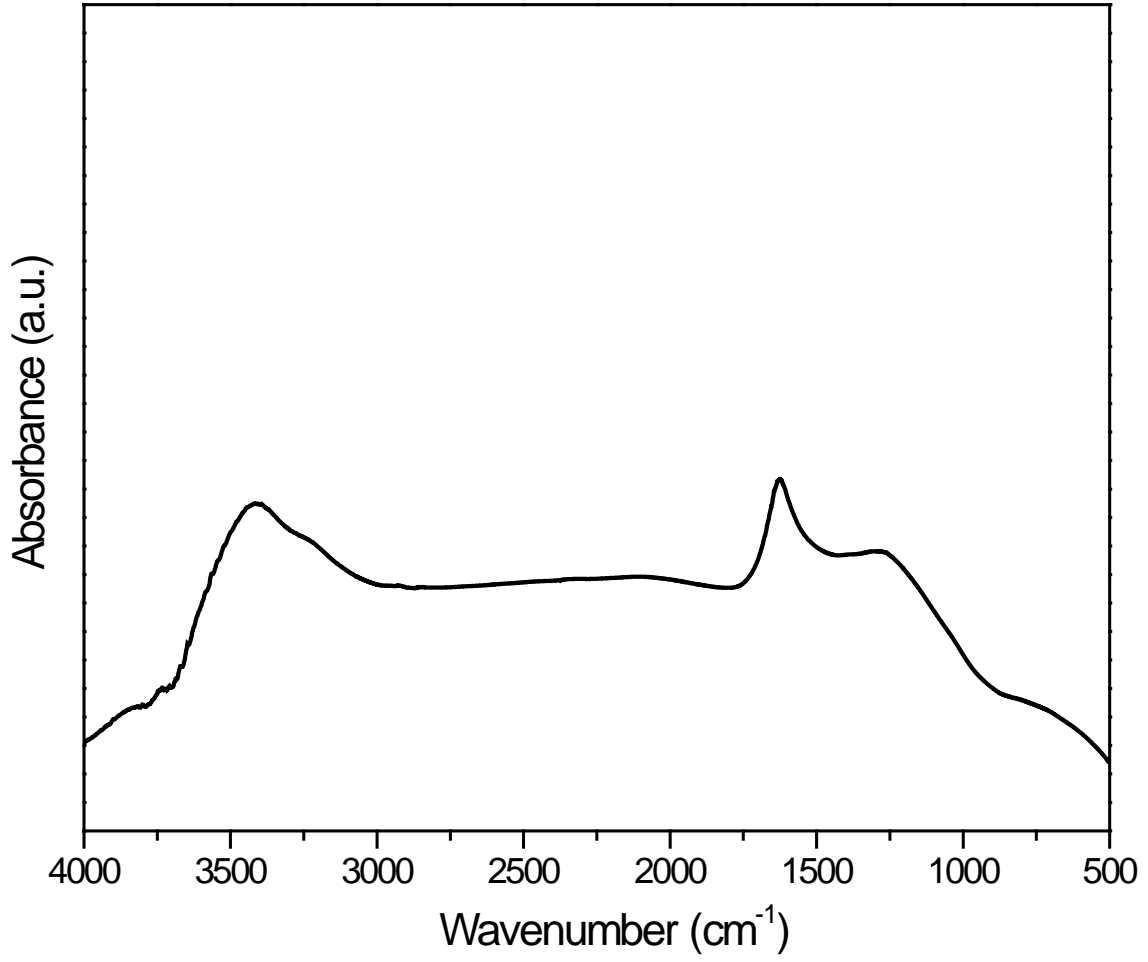

**Figure S1.** FT-IR profile of Pyrene-CTF-20.

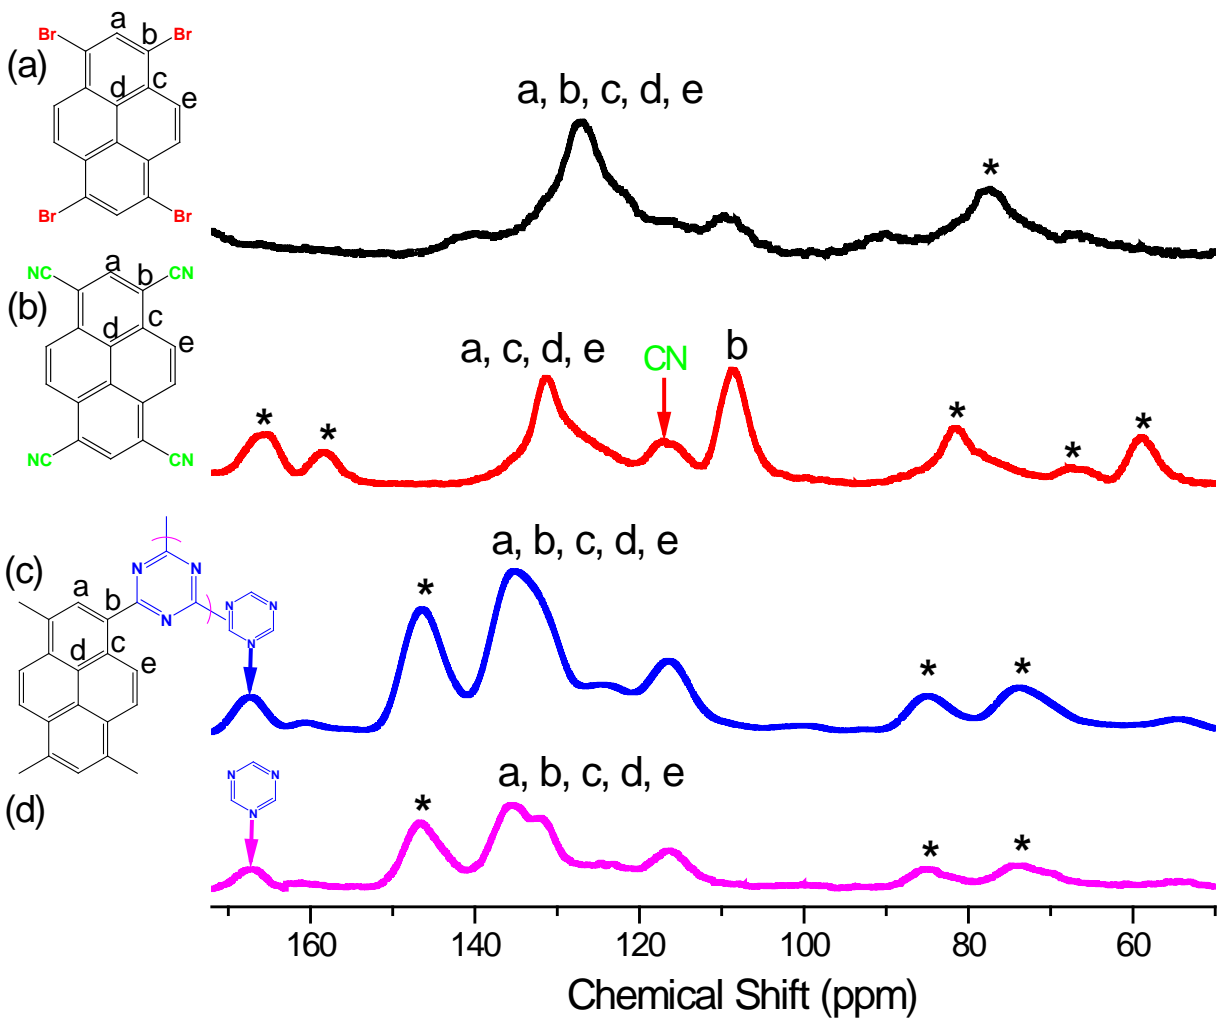

**Figure S2.**  $^{13}\text{C}$  CP/MAS NMR spectra of (a) TBrPy, (b) TCNPy, (c) Pyrene-CTF-10 and (d) Pyrene-CTF-20.

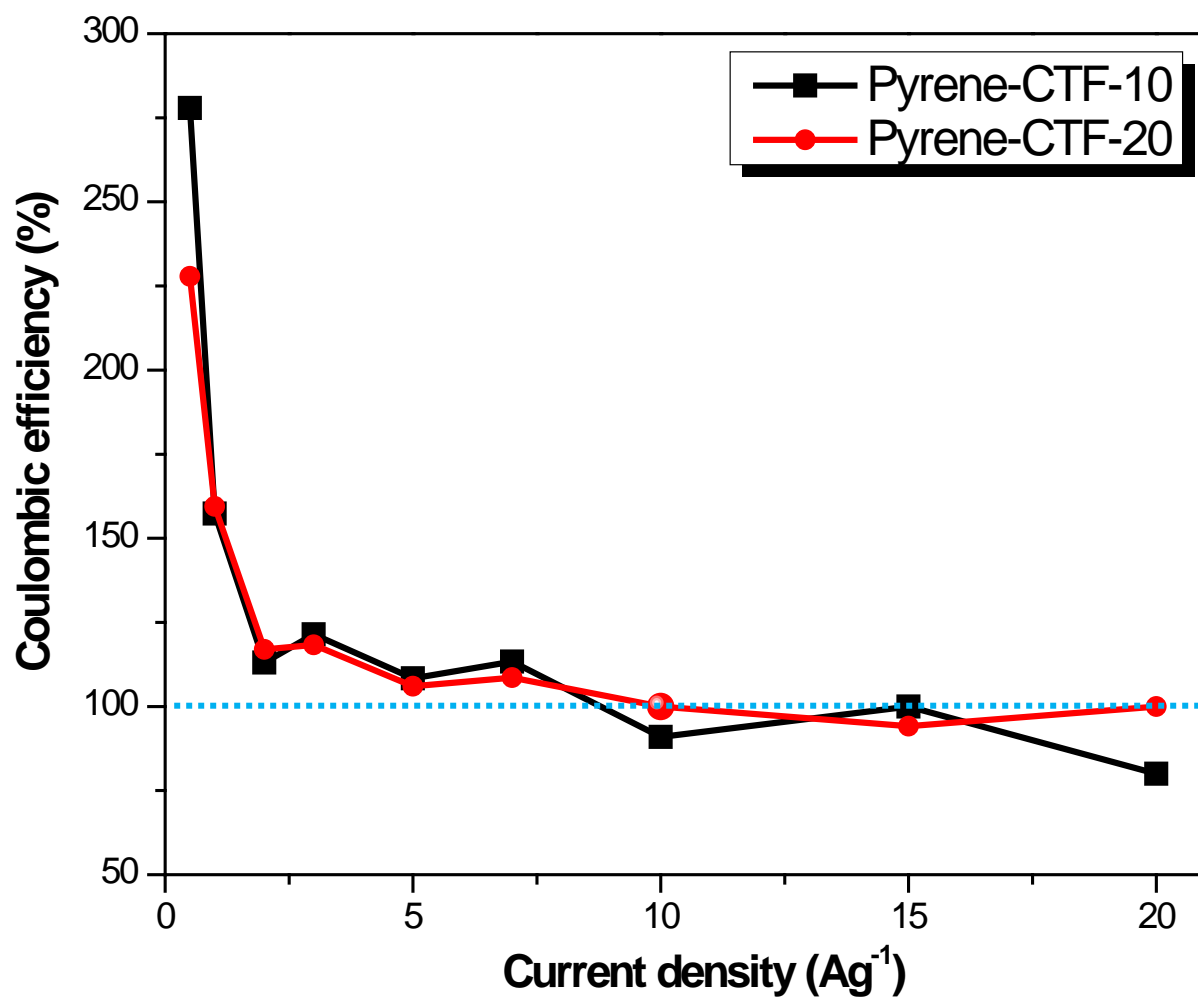

**Figure S3.** Coulombic efficiency vs Current density ( $\text{Ag}^{-1}$ ) of Pyrene-CTF-10 and Pyrene-CTF-20.

| Material                                                     | Surface area (m <sup>2</sup> g <sup>-1</sup> ) | Capacitance                      | Ref.      |
|--------------------------------------------------------------|------------------------------------------------|----------------------------------|-----------|
| Porous carbon derived from MOF                               | 1276                                           | 270 F/g @ 2 Ag <sup>-1</sup>     | S1        |
| Nitrogen-doped graphitic carbon                              | 1327                                           | 255 F/g @ 2 Ag <sup>-1</sup>     | S2        |
| Phenolic formaldehyde resin                                  | 1256                                           | 261 F/g @ 0.05 Ag <sup>-1</sup>  | S3        |
| Amorphous Terephthalonitrile derived nitrogen-rich framework | 1681                                           | 298 F/g @ 0.2 Ag <sup>-1</sup>   | S4        |
| Triazine containing porous organic                           | 317                                            | 151.3 F/g @ 0.1Ag <sup>-1</sup>  | S5        |
| Carbonization of Triazine-based covalent organic polymer     | 2003                                           | 278 F/g @ 1.0 Ag <sup>-1</sup>   | S6        |
| Triazine N doped carbon derivatives                          | 1268                                           | 325 F/g @ 0.5 Ag <sup>-1</sup>   | S7        |
| Nitrogen-enriched Nanoporous Polytriazine                    | 838                                            | 656 F/g @ 1.0 Ag <sup>-1</sup>   | S8        |
| Covalent Traizine framework                                  | 651                                            | 354 F/g @ 2 mV/s                 | S9        |
| Covalent Triazine-Based Framework                            | 3600                                           | 380 F/g @ 0.2 Ag <sup>-1</sup>   | S10       |
| Covalent triazine-based frameworks                           | 29                                             | 122.6 F/g @ 1.0mV/s              | S11       |
| Porous triazine-based frameworks                             | 2482                                           | 151.3 F/g @ 0.1 Ag <sup>-1</sup> | S12       |
| Benzimidazole grafted graphene                               |                                                | 410 F/g @ 0.4 Ag <sup>-1</sup>   | S13       |
| Nitrogen-enriched porous carbon sphere                       |                                                | 410 F/g @ 1 Ag <sup>-1</sup>     | S14       |
| Pyrene-based covalent triazine frameworks                    | 1019                                           | 500 F/g @ 0.5mV/s                | This work |

**Table S1.** Performance comparison of various CTF and porous carbons materials.

**Table S2.** Performance comparison of Pyrene-CTFs and other reported CTFs for CO<sub>2</sub> uptake.

| Samples       | CO <sub>2</sub> uptake (mmole/g) |       | Ref       |
|---------------|----------------------------------|-------|-----------|
|               | 298 K                            | 273 K |           |
| Pyrene-CTF-10 | 2.82                             | 5.10  | This work |
| Pyrene-CTF-20 | 2.54                             | 3.43  | This work |
| CTF-Ph        | -                                | 3.05  | S15       |
| CTF-20-400    | -                                | 3.48  | S16       |
| CTF-5-500     | -                                | 3.02  | S16       |
| TPC-1         | -                                | 4.90  | S17       |
| cCTF-400      | -                                | 2.86  | S18       |
| cCTF-500      | -                                | 3.022 | S18       |
| CTF-1-600     | -                                | 3.83  | S19       |

## References

- S1. J. Tang, R. R. Salunkhe, J. Liu, N. L. Torad, M. Imura, S. Furukawa and Y. Yamauchi, Thermal Conversion of Core–Shell Metal–Organic Frameworks: A New Method for Selectively Functionalized Nanoporous Hybrid Carbon. *J. Am. Chem. Soc.*, 2015, **137**, 1572-1580.
- S2. D. Puthusseri, V. Aravindan, S. Madhavi and S. Ogale, 3D micro-porous conducting carbon beehive by single step polymer carbonization for high performance supercapacitors: the magic of in situ porogen formation. *Energy. Environ. Sci.*, 2014, **7**, 728-735.
- S3. J. Zhang, W. Zhang, M. Han and J. Pang, One pot synthesis of nitrogen-doped hierarchical porous carbon derived from phenolic formaldehyde resin with sodium citrate as activation agent for supercapacitors. *J. Mater. Sci.: Mater. Electronics*, 2018, **29**, 4639-4648.
- S4. L. Hao, B. Luo, X. Li, M. Jin, Y. Fang, Z. Tang, Y. Jia, M. Liang, A. Thomas, J. Yang and L. Zhi, L. Terephthalonitrile-derived nitrogen-rich networks for high performance supercapacitors. *Energy Environ. Sci.*, 2012, **5**, 9747-9751.
- S5. L. Xu, R. Liu, F. Wang, S. Yan, X. Shi and J. Yang, Preparation of triazine containing porous organic polymer for high performance supercapacitor applications. *RSC Adv.*, 2019, **9**, 1586-1590.
- S6. M. Kim, P. Puthiaraj, Y. Qian, Y. Kim, S. Jang, S. Hwang, E. Na, W. S. Ahn and S. E. Shim, High performance carbon supercapacitor electrodes derived from a triazine-based covalent organic polymer with regular porosity. *Electrochim. Acta*, 2018, **284**, 98-107.
- S7. L. Peng, Q. Guo, Z. Ai, Y. Zhao, Y. Liu and D. Wei, Nitrogen doped carbons derived from graphene aerogel templated triazine-based conjugated microporous polymers for high-performance supercapacitors. *Frontiers Chem.*, 2019, **7**, 142.

S8. M. Chaudhary, A. K. Nayak, R. Muhammad, D. Pradhan and P. Mohanty, Nitrogen-enriched nanoporous polytriazine for high-performance supercapacitor application. *ACS Sustainable Chem. Eng.*, 2018, **6**, 5895-5902.

S9. P. Bhanja, K. Bhunia, S. K. Das, D. Pradhan, R. Kimura, Y. Hijikata, S. Irle and A. Bhaumik, A new triazine-based covalent organic framework for high-performance capacitive energy storage. *ChemSusChem*, 2017, **10**, 921-929.

S10. Y. Li, S. Zheng, X. Liu, P. Li, L. Sun, R. Yang, S. Wang, Z. S. Wu, X. Bao and W. Q. Deng, Conductive microporous covalent triazine-based framework for high-performance electrochemical capacitive energy storage. *Angew. Chem. Int. Ed.*, 2018, **57**, 7992-7996.

S11. D. Liu, X. Ning, Y. Hong, Y. Li, Q. Bian and J. Zhang, Covalent triazine-based frameworks as electrodes for high-performance membrane capacitive deionization. *Electrochimica Acta*, 2019, **296**, 327-334.

S12. L. Hao, J. Ning, B. Luo, B. Wang, Y. Zhang, Z. Tang, J. Yang, A. Thomas and L. Zhi, Structural evolution of 2D microporous covalent triazine-based framework toward the study of high-performance supercapacitors. *J. Am. Chem. Soc.*, 2015, **137**, 219-225.

S13. W. Ai, W. Zhou, Z. Du, Y. Du, H. Zhang, X. Jia, L. Xie, M. Yi, T. Yu and W. Huang, Benzoxazole and benzimidazole heterocycle-grafted graphene for high-performance supercapacitor electrodes. *J. Mater. Chem.*, 2012, **22**, 23439-23446.

S14. N. P. Wickramaratne, J. Xu, M. Wang, L. Zhu, L. Dai and M. Jaroniec, Nitrogen Enriched Porous Carbon Spheres: Attractive Materials for Supercapacitor Electrodes and CO<sub>2</sub> Adsorption. *Chem. Mater.*, 2014, **26**, 2820-2828.

S15. G. Tuci, M. Pilaski, H. Ba, A. Rossin, L. Luconi, S. Caporali, C. Pham-Huu, R. Palkovits, G. Giambastiani, Unraveling surface basicity and bulk morphology relationship on covalent



triazine frameworks with unique catalytic and gas adsorption properties. *Adv. Funct. Mater.* 2017, **27**, 1605672.

S16. G. Wang, K. Leus, S. Zhao, P. V. D. Voort, Newly designed covalent triazine framework based on novel N-heteroaromatic building blocks for efficient CO<sub>2</sub> and H<sub>2</sub> capture and storage. *ACS Appl. Mater. Interfaces* 2018, **10**, 1244–1249.

S17. X. M. Hu, Q. Chen, Y. C. Zhao, B. W. Laursen, B. H. Han, Straightforward synthesis of a triazine-based porous carbon with high gas-uptake capacities. *J. Mater. Chem. A* 2014, **2**, 14201–14208.

S18. Y. J. Lee, S. N. Naidu, A. Coskun, Chemically activated covalent triazine frameworks with enhanced textural properties for high capacity gas storage. *ACS Appl. Mater. Interfaces* 2017, **9**, 30679–30685.

S19. Y. F. Zhao, K. X. Yao, B. Y. Teng, T. Zhang, Y. Han, A perfluorinated covalent triazine-based framework for highly selective and water-tolerant CO<sub>2</sub> capture. *Energy Environ. Sci.* 2013, **6**, 3684–3692.
